# Supplementary material for: Targeting exofacial protein thiols with GdIII complexes. An efficient procedure for MRI cell labelling
Source: Royal Society of Chemistry journal article supplement (doi:10.1039/b820593k), 2009-01-01
Supplement: b820593k.pdf [file b820593k.pdf]

### Determination of Gd<sup>III</sup> content in cells.

At the end of the uptake experiment, the medium was removed and cells washed three times with EBSS buffer. Cells were then collected in 200 $\mu$ L EBSS (Earl's balanced salt solution) and were sonicated for 10s for a complete lysis, added with the same volume of HCl 37% and left at 120°C overnight. Upon this treatment all Gd<sup>III</sup> was solubilized as free aquo-ion. By measuring the water proton relaxation rate of these solutions, it is possible to determine its concentration.<sup>1</sup> Relaxation rate measurements were performed at 20 MHz and 25°C on a Spinmaster spectrometer (Stelar, Mede, Italy), by using a conventional Inversion Recovery pulse sequence. The obtained  $R_{1\text{obs}}$  data are related to the concentration of the paramagnetic species according to the formula:

$$R_{1\text{obs}} = R_{1\text{W}} + [\text{Gd}^{\text{III}}] \cdot r_{1\text{p}}^{\text{Gd(III)}}$$

where  $R_{1\text{W}}$  is the relaxation rate of pure water (0.38 s<sup>-1</sup>) and  $r_{1\text{p}}^{\text{Gd(III)}}$  the millimolar relaxivity of the Gd<sup>III</sup> aquo-ion (13.5 mM<sup>-1</sup>s<sup>-1</sup> in 6M HCl, 25 °C). The moles of Gd<sup>III</sup> obtained in this way were normalized against the weight (in milligrams) of cellular proteins. The protein concentration of each sample was determined from cell lysates by the Bradford method<sup>2</sup> using bovine serum albumin as the standard.

### References

- 1) a) S. Geninatti Crich, L. Biancone, V. Cantaluppi, D. Duò, G. Esposito, S. Russo, G. Camussi and S. Aime, *Magn. Reson. Med.*, 2004, **51**, 938-944; b) C. Cabella, S. Geninatti Crich, D. Corpillo, A. Barge, C. Ghirelli, E. Bruno, V. Lorusso, F. Uggeri, S. Aime *Contrast Media & Molecular Imaging* 2006, **1**:23-29.
- 2) M.M. Bradford *Anal. Biochem.* 1976, **72**:142-146.
